# Supplementary material for: Methylglyoxal-Modified Human Serum Albumin Binds to Leukocyte Myeloperoxidase and Inhibits its Enzymatic Activity
Source: MDPI journal article supplement (doi:10.3390/antiox11112263), 2022-11-16
Supplement: s1 [file s1]

# Methylglyoxal-Modified Human Serum Albumin Binds to Leukocyte Myeloperoxidase and Inhibits its Enzymatic Activity

Oleg M. Panasenko <sup>1,2,\*</sup>, Viktor A. Ivanov <sup>1</sup>, Elena V. Mikhalechik <sup>1</sup>, Irina V. Gorudko <sup>3</sup>, Daria V. Grigorieva <sup>3</sup>, Liliya Yu. Basyreva <sup>1</sup>, Ekaterina V. Shmeleva <sup>1</sup>, Sergey A. Gusev <sup>1</sup>, Valeria A. Kostevich <sup>1,4</sup>, Nikolay P. Gorbunov <sup>1,4</sup> and Alexey V. Sokolov <sup>1,4</sup>

<sup>1</sup> Department of Biophysics, Federal Research and Clinical Center of Physical-Chemical Medicine of Federal Medical Biological Agency, Moscow 119435, Russia

<sup>2</sup> Department of Medical Biophysics of the Institute for Translative Medicine, Pirogov Russian National Research Medical University, Moscow 117997, Russia

<sup>3</sup> Department of Biophysics, Belarusian State University, 220030 Minsk, Belarus

<sup>4</sup> Department of Molecular Genetics, Institute of Experimental Medicine, St. Petersburg 197376, Russia

\* Correspondence: o-panas@mail.ru; Tel.: +7-499-246-44-90

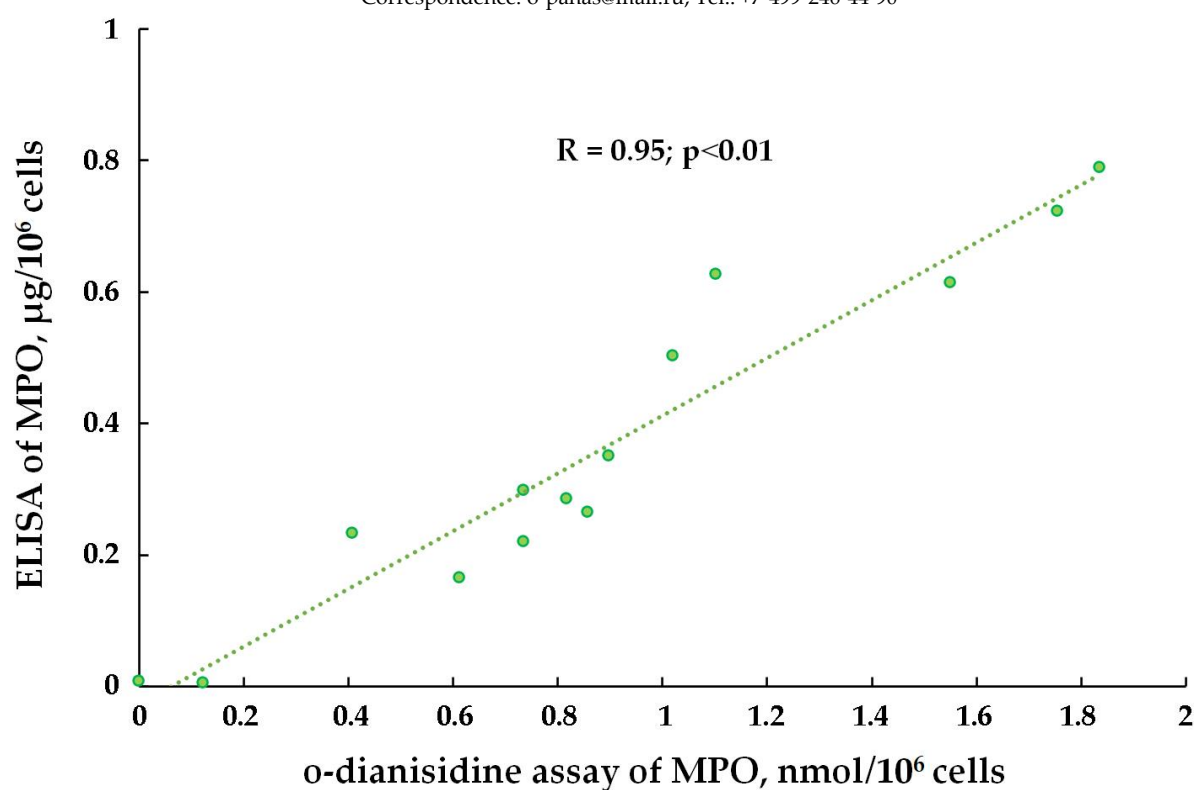

**Figure S1.** Correlation between MPO peroxidase activity assessed by o-dianisidine test and MPO concentration assayed by ELISA in the supernatants of neutrophils incubated with stimulators in the absence of HSA-MG.

### Blood smear 1 (scale bar is 10 $\mu\text{m}$ )

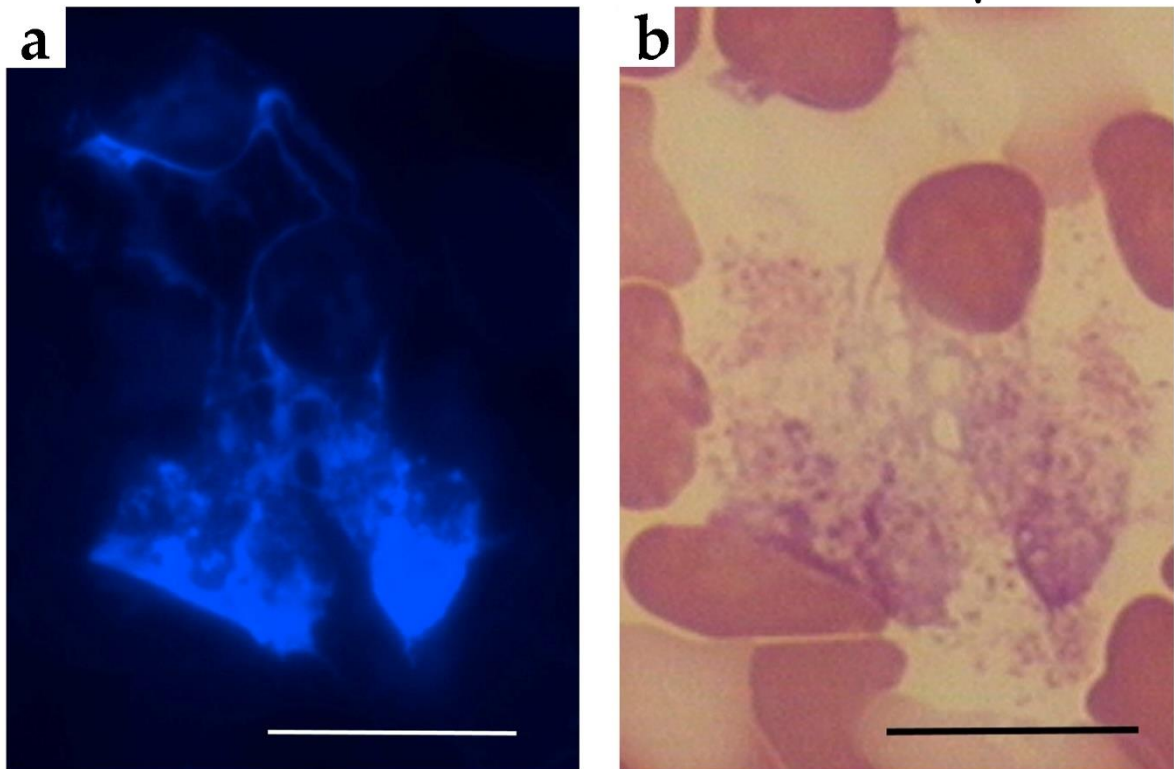

### Blood smear 2 (scale bar is 30 $\mu\text{m}$ )

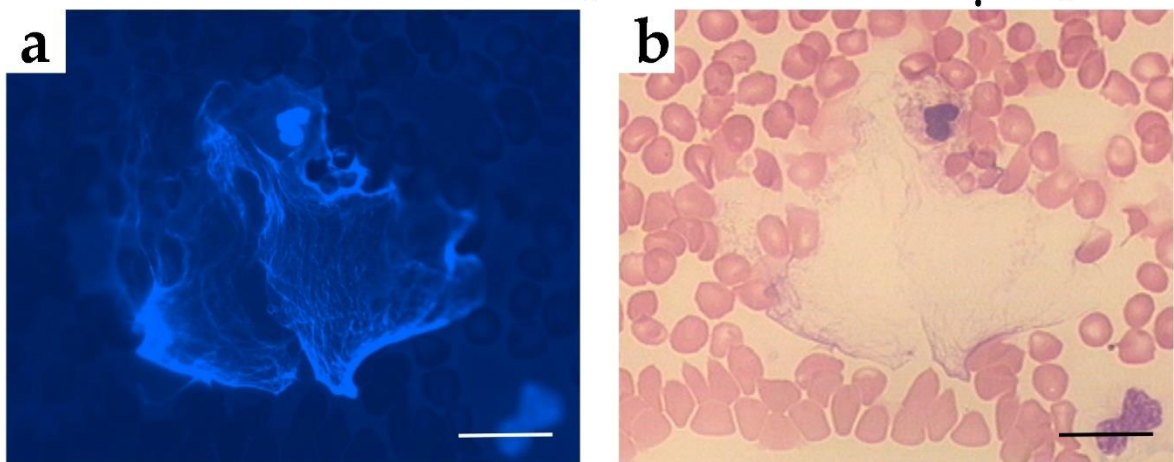

**Figure S2.** NET-like structures: (a) stained with Hoechst 33342 dye, fluorescent microscopy; (b) stained with Romanowsky dye, light microscopy.

**Table S1.** Comparison of mAbs against MPO used in study

| mAb  | Working combination for hemi-MPO detection with HRP-labeled mAb (tested mAb on solid phase) | Detection of dimeric MPO with same HRP-labeled mAb (tested mAb on solid phase) | Resistance of interaction with MPO to 2 M NaCl |
|------|---------------------------------------------------------------------------------------------|--------------------------------------------------------------------------------|------------------------------------------------|
| 1#8  | 2#7-HRP                                                                                     |                                                                                |                                                |
|      | 4#2-HRP                                                                                     |                                                                                |                                                |
|      | 4#4-HRP                                                                                     | +                                                                              | +                                              |
|      | 4#8-HRP                                                                                     |                                                                                |                                                |
|      | 4#10-HRP                                                                                    |                                                                                |                                                |
| 2#7  | 1#8-HRP                                                                                     |                                                                                |                                                |
|      | 4#2-HRP                                                                                     |                                                                                |                                                |
|      | 4#4-HRP                                                                                     | +                                                                              | -                                              |
|      | 4#8-HRP                                                                                     |                                                                                |                                                |
|      | 4#10-HRP                                                                                    |                                                                                |                                                |
| 4#2  | 1#8-HRP                                                                                     |                                                                                |                                                |
|      | 2#7-HRP                                                                                     |                                                                                |                                                |
|      | 4#4-HRP                                                                                     | +                                                                              | -                                              |
|      | 4#8-HRP                                                                                     |                                                                                |                                                |
|      | 4#10-HRP                                                                                    |                                                                                |                                                |
| 4#4  | 1#8-HRP                                                                                     |                                                                                |                                                |
|      | 2#7-HRP                                                                                     |                                                                                |                                                |
|      | 4#2-HRP                                                                                     | No detection                                                                   | -                                              |
|      | 4#4-HRP                                                                                     |                                                                                |                                                |
|      | 4#10-HRP                                                                                    |                                                                                |                                                |
| 4#8  | 1#8-HRP                                                                                     |                                                                                |                                                |
|      | 2#7-HRP                                                                                     |                                                                                |                                                |
|      | 4#2-HRP                                                                                     | +                                                                              | -                                              |
|      | 4#4-HRP                                                                                     |                                                                                |                                                |
|      | 4#10-HRP                                                                                    |                                                                                |                                                |
| 4#10 | No working combinations                                                                     | No detection                                                                   | +                                              |

Note: For unambiguous characterisation of epitope specificity of solid-phase immobilized and labeled mAbs we used hemi-MPO and not MPO dimer, due to the fact that results obtained with MPO dimer in sandwich ELISA cannot be interpreted in a unique manner (in terms of epitope specificity of mAbs).

**Table S2.** Comparison of ABTS and CB oxidation in absence and presence of HSA and HSA-MG (n = 3)

| Reaction mixture | ABTS oxidation – $A_{414}/\text{min}$<br>(1 mM ABTS, 5 nM HRP,<br>2 mM H <sub>2</sub> O <sub>2</sub> , 50 mM Na-<br>acetate buffer, pH 5.5) | CB oxidation – $\mu\text{M HOCl}$<br>(200 $\mu\text{M}$ CB, 25 $\mu\text{M}$ HOCl, 150 mM<br>NaCl, 2 mM taurine, 10 $\mu\text{M}$ KI,<br>20 mM Na-phosphate buffer,<br>pH 5.8) |
|------------------|---------------------------------------------------------------------------------------------------------------------------------------------|--------------------------------------------------------------------------------------------------------------------------------------------------------------------------------|
|                  |                                                                                                                                             |                                                                                                                                                                                |
| Control          | $0.996 \pm 0.031$                                                                                                                           | $24.8 \pm 0.4$                                                                                                                                                                 |
| 500 nM HSA       | $1.019 \pm 0.042$                                                                                                                           | $25.1 \pm 0.3$                                                                                                                                                                 |
| 500 nM HSA-MG    | $1.004 \pm 0.029$                                                                                                                           | $24.9 \pm 0.4$                                                                                                                                                                 |

**Table S3.** Comparison of neutrophil functional activity in type 2 diabetes mellitus and the effects of HSA-MG on neutrophils in vitro (see articles [1–9])

| Functional activity of neutrophil     | Type 2 diabetes mellitus | HSA-MG (this study) |
|---------------------------------------|--------------------------|---------------------|
| Expression of CD11b                   | Increased [1–3]          | Increased           |
| Expression of CD63, exocytosis of AGs | No effect [4]            | No effect           |
| MPO chlorinating activity             | Decreased [5,6]          | Inhibition          |
| Lum-CL                                | No effect [5]            | No effect           |
| Luc-CL, NADPH-oxidase activity        | Increased [6–9]          | Increased           |
| NETosis                               | No effect [4]            | No effect           |

## References

1. Senior, P.A.; Marshall, S.M.; Thomas, T.H. Dysregulation of PMN antigen expression in Type 2 diabetes may reflect a generalized defect of exocytosis: Influence of hypertension and microalbuminuria. *J. Leukoc. Biol.* **1999**, *65*, 800–807. <https://doi.org/10.1002/jlb.65.6.800>.
2. Advani, A.; Marshall, S.M.; Thomas, T.H. Impaired neutrophil actin assembly causes persistent CD11b expression and reduced primary granule exocytosis in Type II diabetes. *Diabetologia* **2002**, *45*, 719–727. <https://doi.org/10.1007/s00125-002-0802-0>.
3. Mastej, K.; Adamiec, R. Neutrophil surface expression of CD11b and CD62L in diabetic microangiopathy. *Acta Diabetol.* **2008**, *45*, 183. <https://doi.org/10.1007/s00592-008-0040-0>.
4. You, Q.; He, D.M.; Shu, G.F.; Cao, B.; Xia, Y.Q.; Xing, Y.; Ni, M.; Chen, J.F.; Shi, S.L.; Gu, H.F.; et al. Increased formation of neutrophil extracellular traps is associated with gut leakage in patients with type 1 but not type 2 diabetes. *J. Diabetes* **2019**, *11*, 665–673. <https://doi.org/10.1111/1753-0407.12892>.
5. De Souza Ferreira, C.; Araújo, T.H.; Ângelo, M.L.; Pennacchi, P.C.; Okada, S.S.; de Araújo Paula, F.B.; Migliorini, S.; Rodrigues, M.R. Neutrophil dysfunction induced by hyperglycemia: Modulation of myeloperoxidase activity. *Cell Biochem. Funct.* **2012**, *30*, 604–610. <https://doi.org/10.1002/cbf.2840>.
6. Unubol, M.; Yavasoglu, I.; Kacar, F.; Guney, E.; Omurlu, I.K.; Ture, M.; Kadikoylu, G.; Bolaman, Z. Relationship between glycemic control and histochemical myeloperoxidase activity in neutrophils in patients with type 2 diabetes. *Diabetol. Metab. Syndr.* **2015**, *7*, 119. <https://doi.org/10.1186/s13098-015-0115-3>.
7. Wong, R.K.M.; Pettit, A.I.; Davies, J.E.; Ng, L.L. Augmentation of the neutrophil respiratory burst through the action of advanced glycation end products. *Diabetes* **2002**, *51*, 2846–2853. <https://doi.org/10.2337/diabetes.51.9.2846>.
8. Mikhailchik, E.V.; Lipatova, V.A.; Basyreva, L.Y.; Panasenkov, O.M.; Gusev, S.A.; Sergienko, V.I. Hyperglycemia and some aspects of leukocyte activation in vitro. *Bull. Experim. Biol. Med.* **2021**, *170*, 748–751. <https://doi.org/10.1007/s10517-021-05147-x>.
9. Omori, K.; Ohira, T.; Uchida, Y.; Ayilavarapu, S.D.; Batista, E.L., Jr.; Yagi, M.; Iwata, T.; Liu, H.; Hasturk, H.; Kantarci, A.; et al. Priming of neutrophil oxidative burst in diabetes requires preassembly of the NADPH oxidase. *J. Leukoc. Biol.* **2008**, *84*, 292–301. <https://doi.org/10.1189/jlb.1207832>.
